# Supplementary material
Source: publisher figshare collection journal article supplement (https://karger.figshare.com/ndownloader/files/13170032)
Supplement: Supplementary file 1 [file 13170032]

| **Supplemental Table A: Cohort Demographics** | | | |
| --- | --- | --- | --- |
|  | **BabiPlus**© **Cohort** | **B&B Bubbler**© **Cohort** | *p* value |
| Time period | 6/2012 to 6/2014 | 6/2014 to 6/2016 |  |
| Total # Infants Born <1250g | 322 | 327 | NS |
| Infants Intubated | 207 (64.2%) | 204 (62.4%) | NS |
| **Demographics on infants intubated in first 48 hours for surfactant** | | | |
|  | *n*=207 | *n*=204 |  |
| Birthweight (g) | 856 ± 211 | 830 ± 196 | NS |
| Gestational Age (weeks) | 26.7 ±2.0 | 26.4 ±2.1 | NS |
| Male gender | 115 (56%) | 106 (52%) | NS |
| Antenatal steroids exposure | 86% | 89% | NS |
| Apgar score 1 minute | 3 ± 2 | 4 ± 2 | NS |
| 5 minute | 6 ± 2 | 6 ± 2 | NS |
| Infants never extubated (death or tracheostomy) | 26 (13%) | 30 (15%) | NS |
| Extubated to NIPPV | 72 (35%) | 35 (18%) | <0.01 |
| Extubated to bCPAP | 109 (53%) | 138 (69%) | <0.01 |
